# Supplementary material
Source: PubMed Central journal article supplement (PMC5496711)

**a**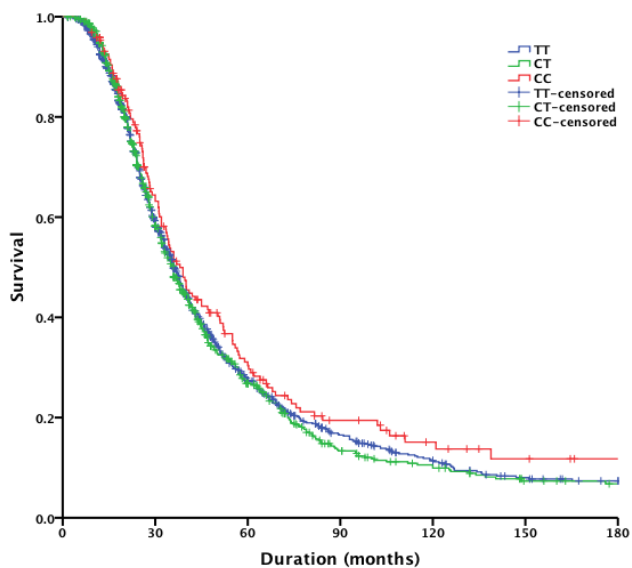**b**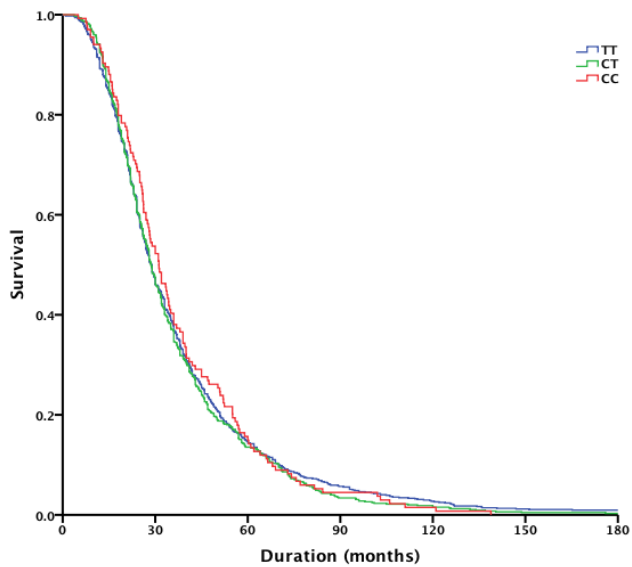

Supplement: NIHMS712434-supplement-Supplementary_Fig__1.pdf [file NIHMS712434-supplement-Supplementary_Fig__1.pdf]

### Belgium

HR=0.70 (0.44-1.11)

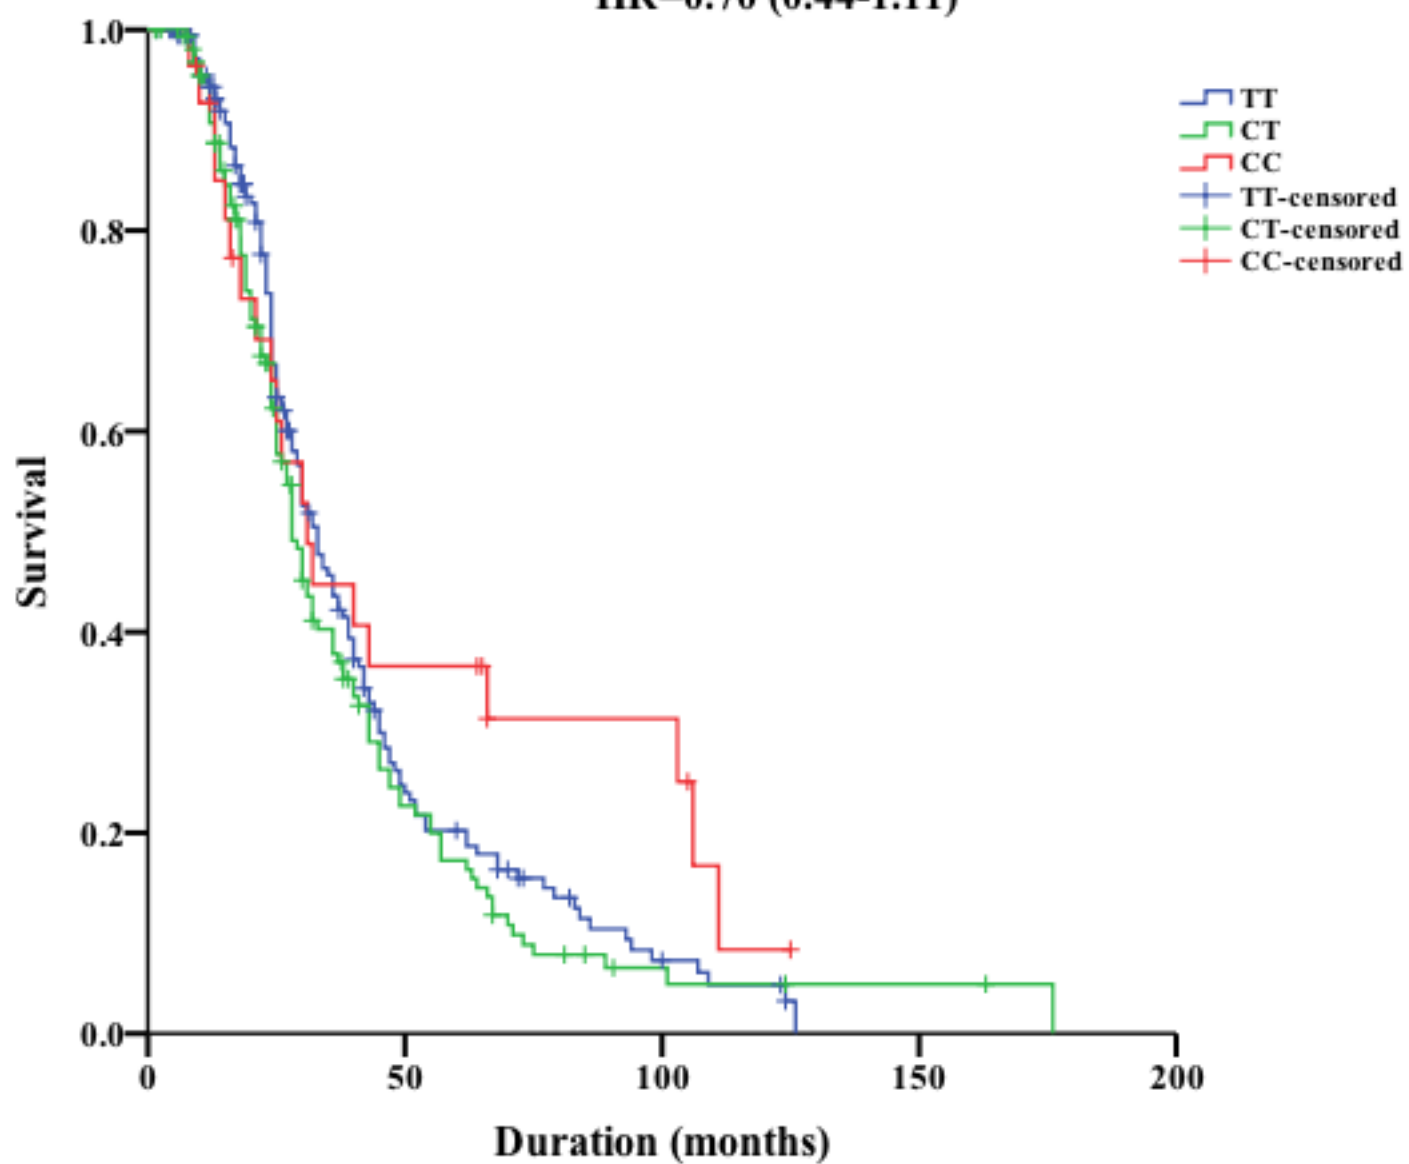

### Germany

HR=1.14 (0.67-1.94)

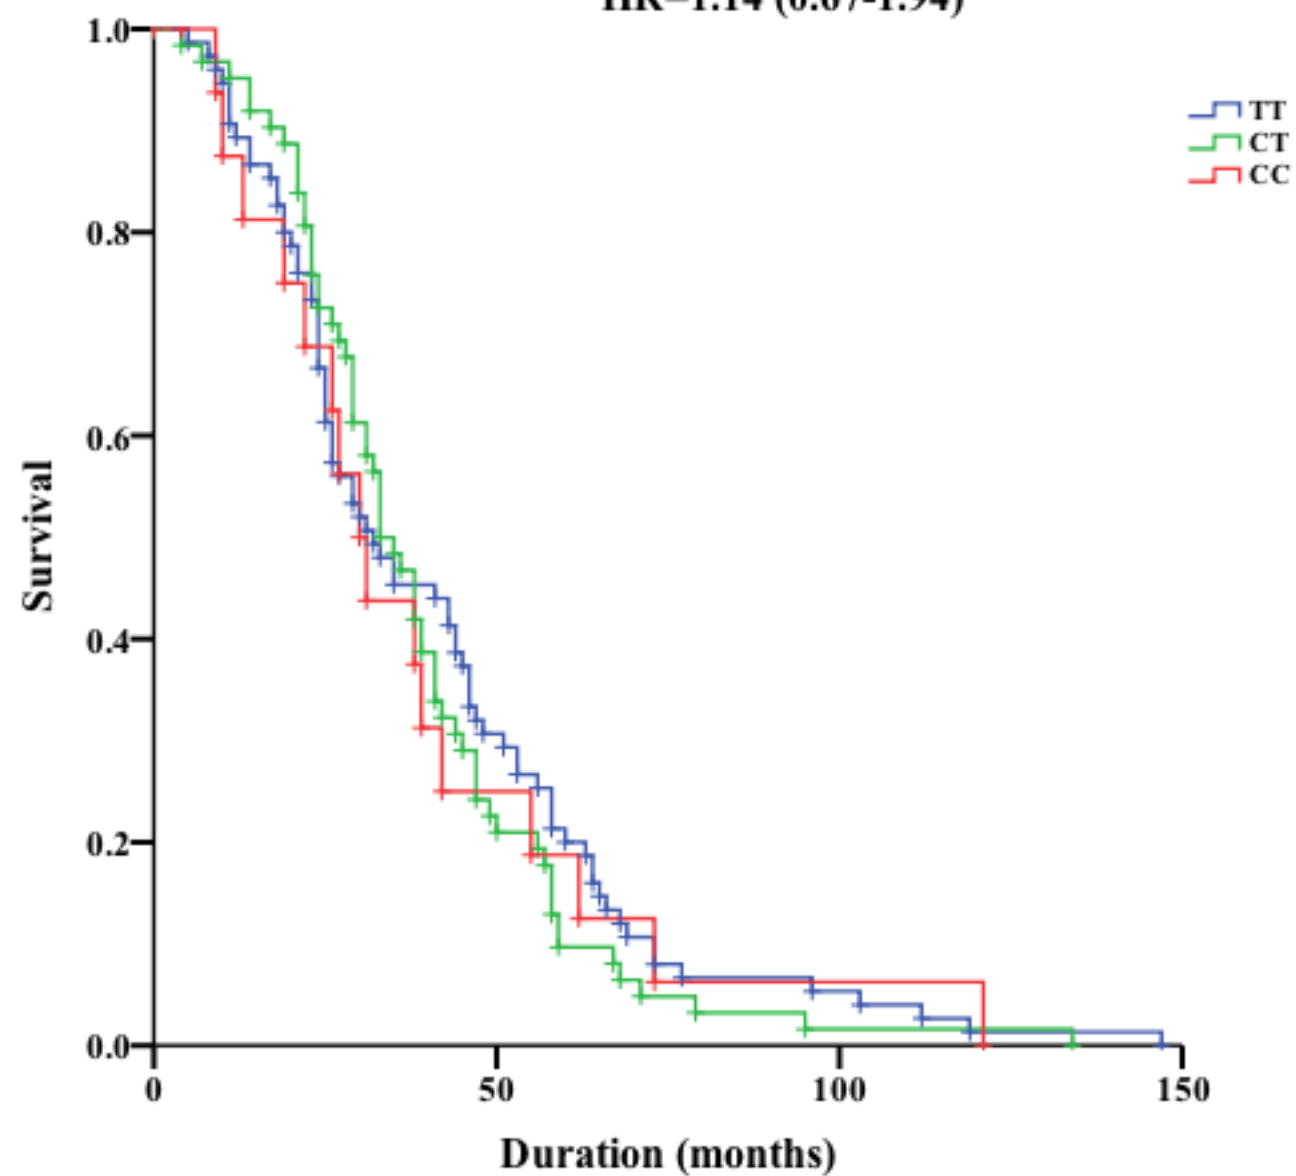

### Ireland

HR=0.97 (0.56-1.68)

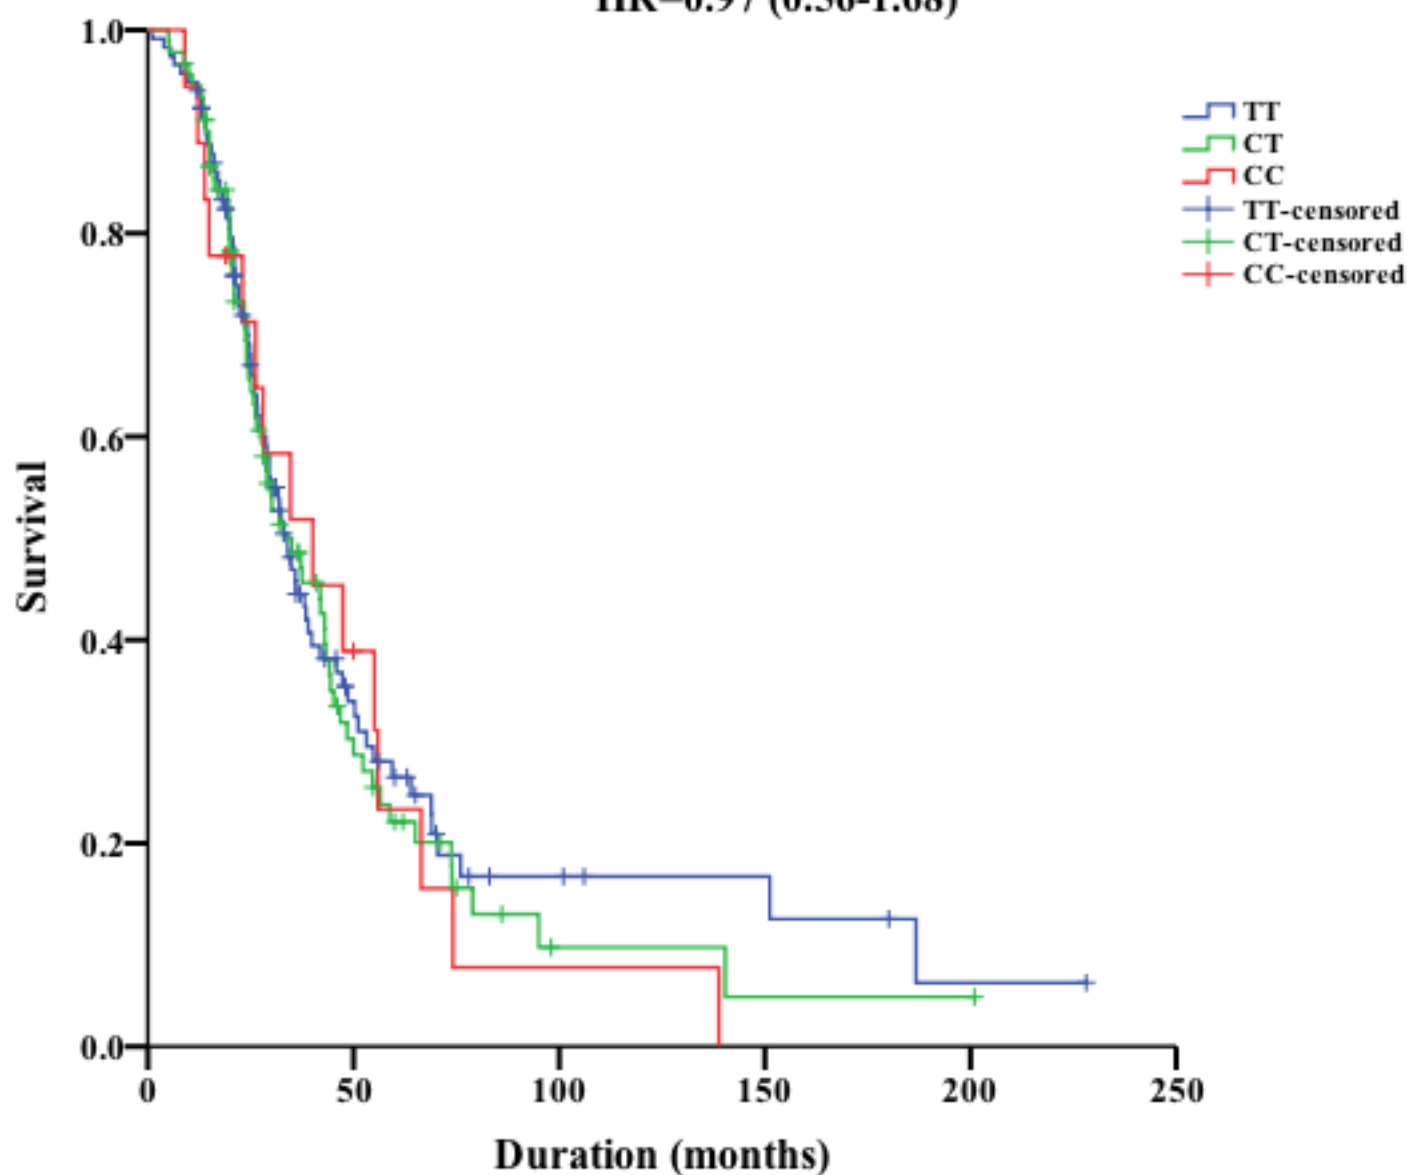

### Italy

HR=0.89 (0.61-1.28)

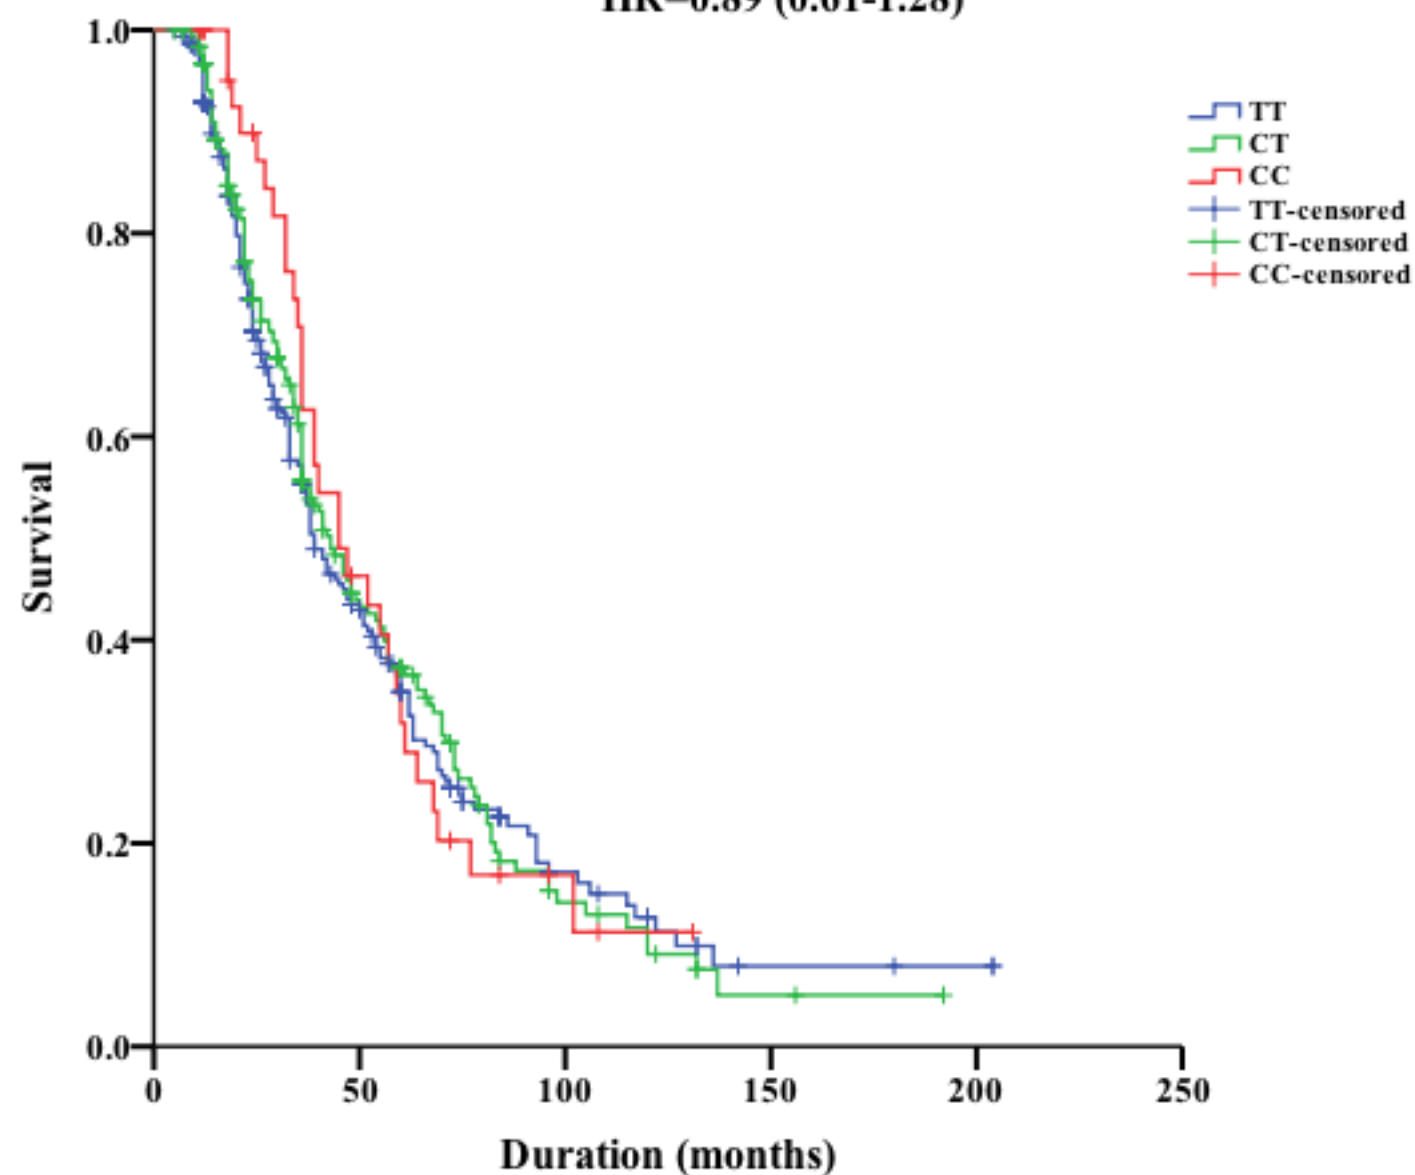

### The Netherlands

HR=0.73 (0.46-1.17)

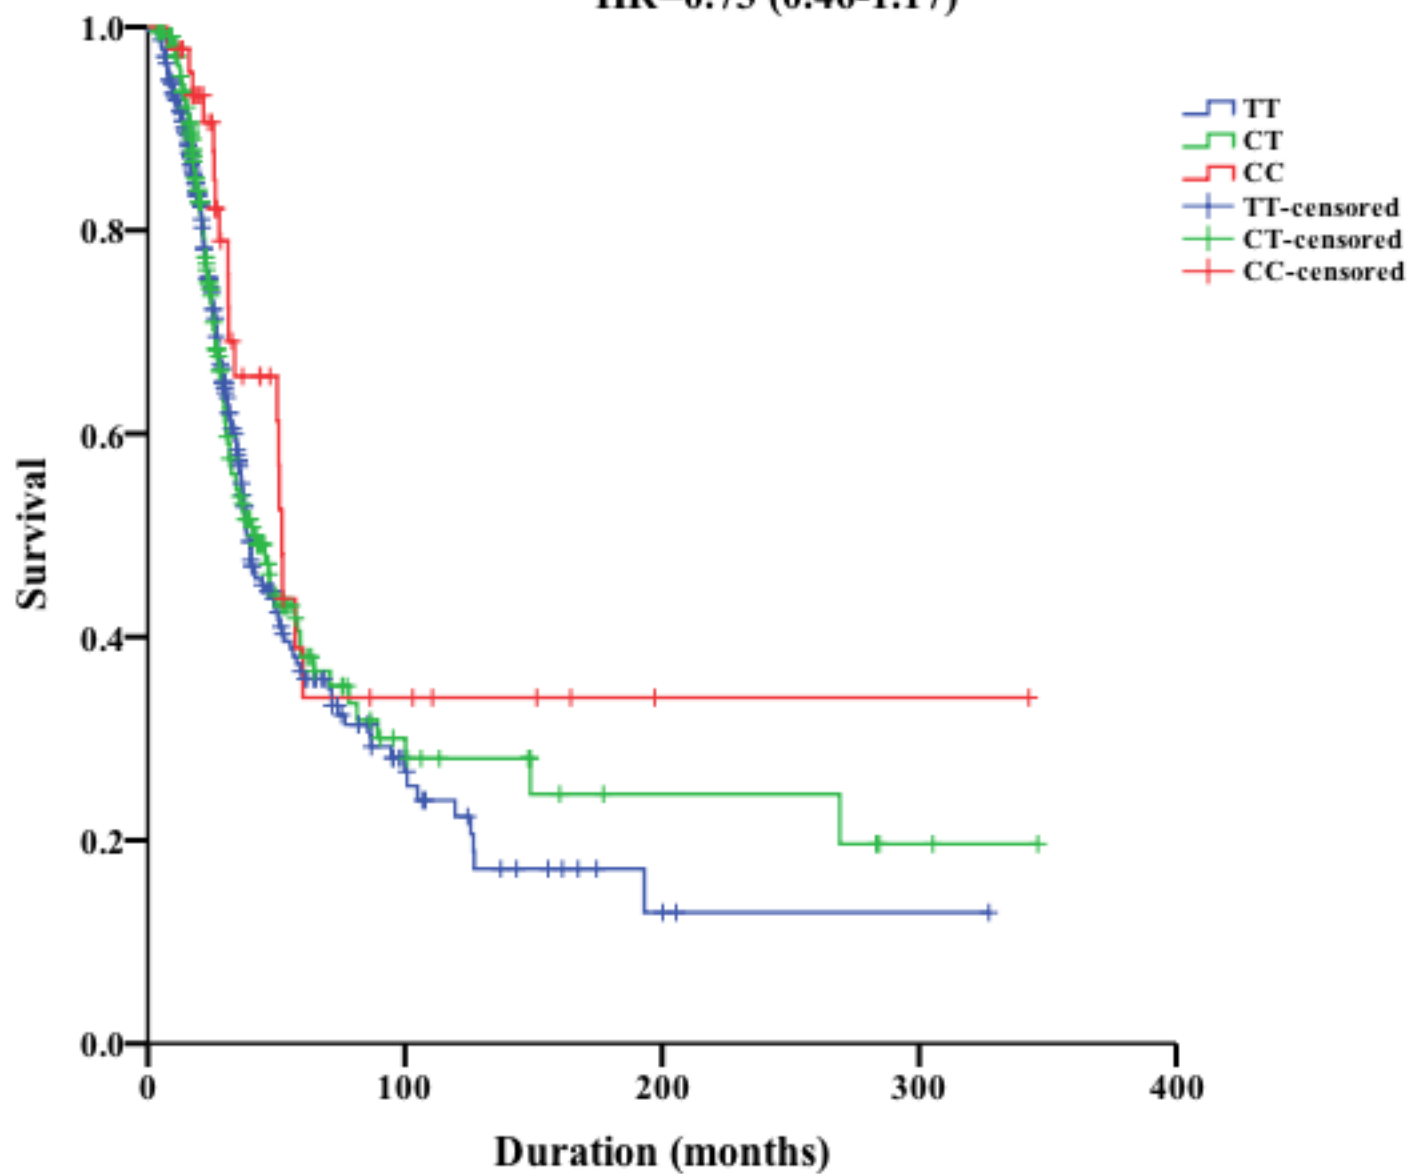

### Sweden

HR=0.95 (0.66-1.36)

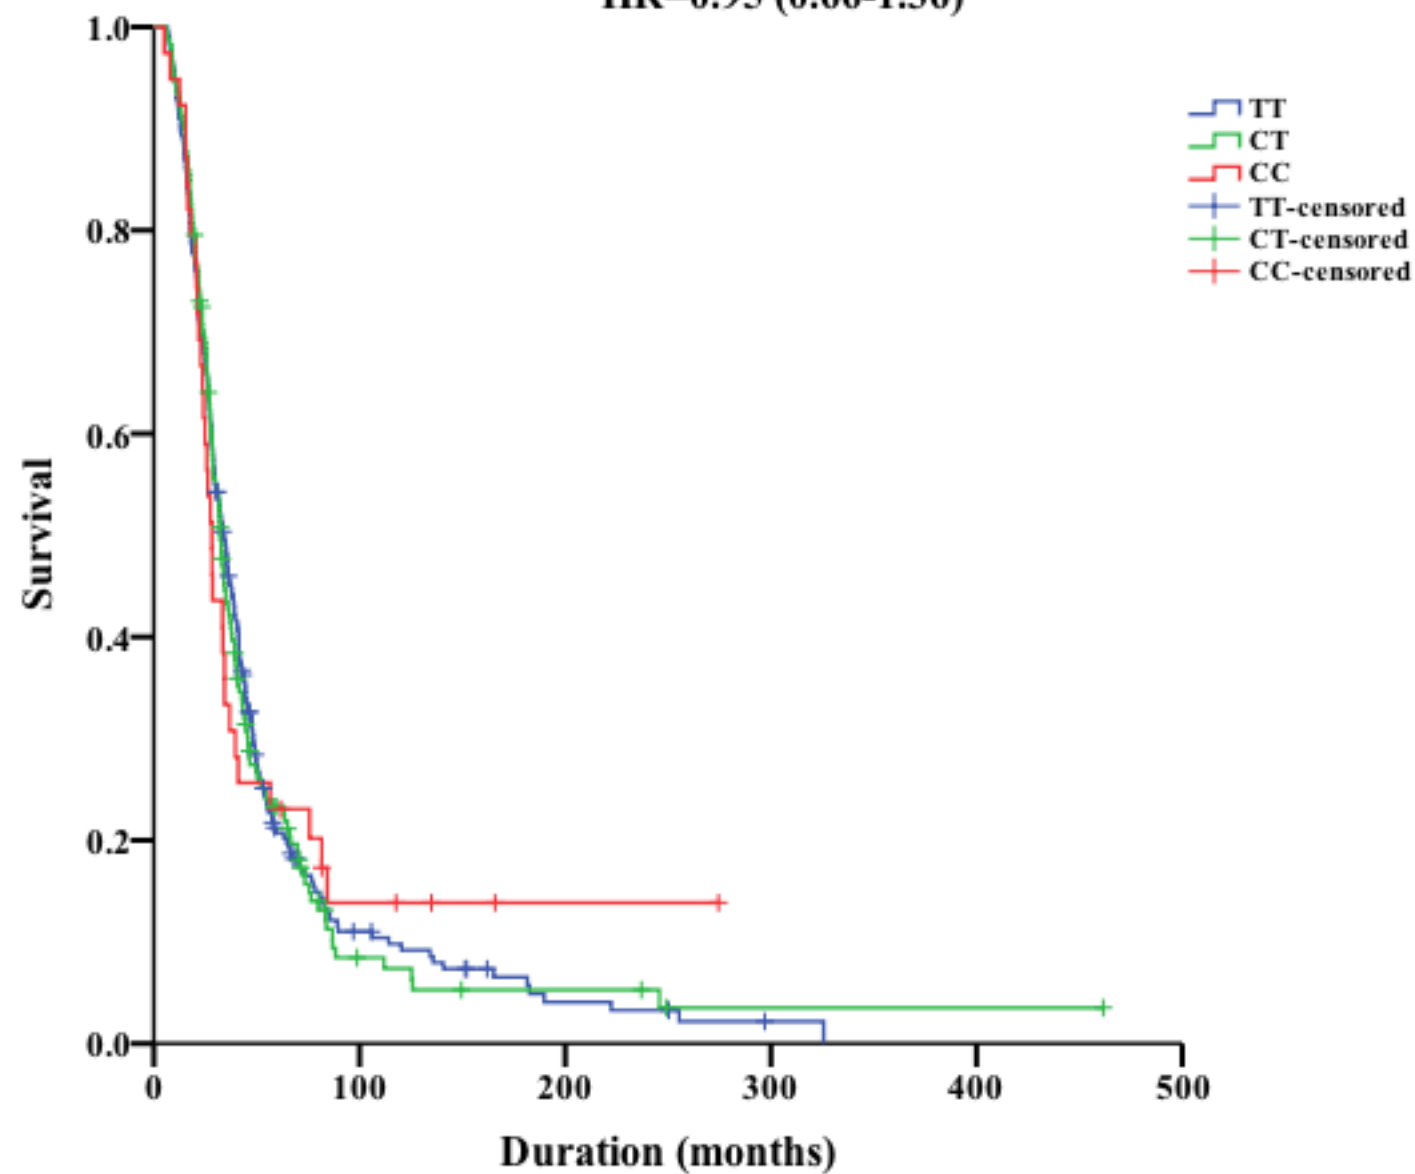

Supplement: NIHMS712434-supplement-Supplementary_Fig__2.pdf [file NIHMS712434-supplement-Supplementary_Fig__2.pdf]
